# Supplementary material for: Evaluating the role of phenethylamine iodide as a novel anti-solvent for enhancing performance of inverted planar perovskite solar cells
Source: Royal Society of Chemistry journal article supplement (doi:10.1039/d0tc01244k), 2020-01-01
Supplement: d0tc01244k1.pdf [file d0tc01244k1.pdf]

## Supplementary Information for

### Evaluating the role of phenethylamine iodide as a novel anti-solvent for enhancing performance of inverted planar perovskite solar cells

*Christos Zervos\**, *Marinos Tountas*, *Konstantinos Chatzimanolis*, *Christos Polyzoidis* and *Emmanuel Kymakis\**

Department of Electrical & Computer Engineering

Hellenic Mediterranean University (HMU)

Estavromenos, 71410 Heraklion, Greece

E-mail: [czervos@hmu.gr](mailto:czervos@hmu.gr) (C.Z); [kymakis@hmu.gr](mailto:kymakis@hmu.gr) (E.K.)

## Experimental section

**Materials:** PTAA was purchased from Solaris and PC<sub>70</sub>CB from Solenne BV; BCP purchased from Sigma-Aldrich. The materials for perovskite layers and devices fabrication were: PbI<sub>2</sub> and PbBr<sub>2</sub> (99.99% purity) bought from TCI, FAI and MABr were purchased from GreatCell Solar. CsI (99.999%) was from Alfa Aesar and RbI (99.8%) obtained from Sigma-Aldrich.

**Solvents:** *Dimethylformamide (DMF) anhydrous 99.8%, Dimethyl sulfoxide (DMSO) anhydrous ≥ 99.9%, Butanol 99.5% and CB 99.8%* were obtained from Sigma-Aldrich. Toluene 99.7% and Isopropanol (IPA) >99.8% purchased from Honeywell Research Chemicals.

**Device fabrication:** ITO/glass patterned substrates were used, purchased from Naranjo Substrates (ITO thickness ~ 100 nm and a sheet resistance of ~20 Ω/sq). The cleaning procedure of the substrates included soap, deionized water, acetone, and isopropanol under ultrasonication. Afterward, the substrates transferred to a nitrogen filled glovebox and treated with ozone for 15 minutes. 2 mg ml<sup>-1</sup> of PTAA in Toluene was used as the hole transport layer and spin coated at 6000 rpm for 30 sec. After spinning, the sample was placed on a hot plate for annealing at 110° C for 10 min. The perovskite precursor solution (1.25 M) was dissolved in 4:1 V/V DMF/DMSO according to a formula of Rb<sub>0.04</sub>Cs<sub>0.05</sub>[(FA<sub>0.85</sub>MA<sub>0.15</sub>)]<sub>0.9</sub>Pb(I<sub>0.85</sub>Br<sub>0.15</sub>)<sub>3</sub>. CsI and RbI solutions of 1.5 M prepared using DMSO and 4:1 V/V DMF/DMSO solvents, respectively and added into the perovskite precursor solution. The RbCsMAFA perovskite layer was deposited on top of PTAA by a one-step dynamic spin-coating procedure using 6000 rpm for 45 sec. The anti-solvent (Chlorobenzene anhydrous 200μL for the control devices or 1 mg ml<sup>-1</sup> PEAI in butanol) was dropped 20 sec before the end of the spinning. Next, the sample was annealed at 100 °C for 45 min. Subsequently, PC<sub>70</sub>BM which was used as an electron transport layer with a concentration of 20 mg ml<sup>-1</sup> of anhydrous CB spin-coated for 60 sec at 1000 rpm on the perovskite surface for the control devices. In the case of post-deposited passivated films, PEAI (1 mg ml<sup>-1</sup> in butanol) was spin coated on top of the annealed perovskite

film and before the PC<sub>70</sub>BM deposition step. Finally, the BCP interlayer with a concentration of 0.5 mg ml<sup>-1</sup> in extra dry IPA was further spin-coated at 4000 rpm for 45 sec. The device fabrication was completed by depositing 100 nm Ag by thermal evaporation.

**Perovskite film characterization:** The XRD spectra was obtained using a D/MAX-2000 X-ray diffractometer with a monochromated Cu K  $\alpha$  irradiation ( $\lambda = 1.5418 \text{ \AA}$ ) at a scan rate of  $4^\circ \text{ min}^{-1}$ . The topography of films was investigated using an atomic force microscope (AFM) (XE7 Park Systems) operating in tapping mode. Steady state PL and transient photovoltage measurements were performed on a commercial transient module system (ARKEO, Cicci research s.r.l.). For the PL measurements the films were excited by a green (532 nm) laser at  $45^\circ$  of incidence with a 1 mm spot diameter. The water contact angle was measured by a contact angle goniometer from Ossila (measurement accuracy  $\pm 1^\circ$ ). Steady-state J-V curves were obtained in a glove box (MBRAUN) under standard simulated AM1.5G irradiation ( $100 \text{ mW cm}^{-2}$ ) at a scan rate of  $10 \text{ mVs}^{-1}$  using a Solar Cell I-V Test System from Ossila. The EQE was measured using a commercial system from Enlitech.

## Characterization

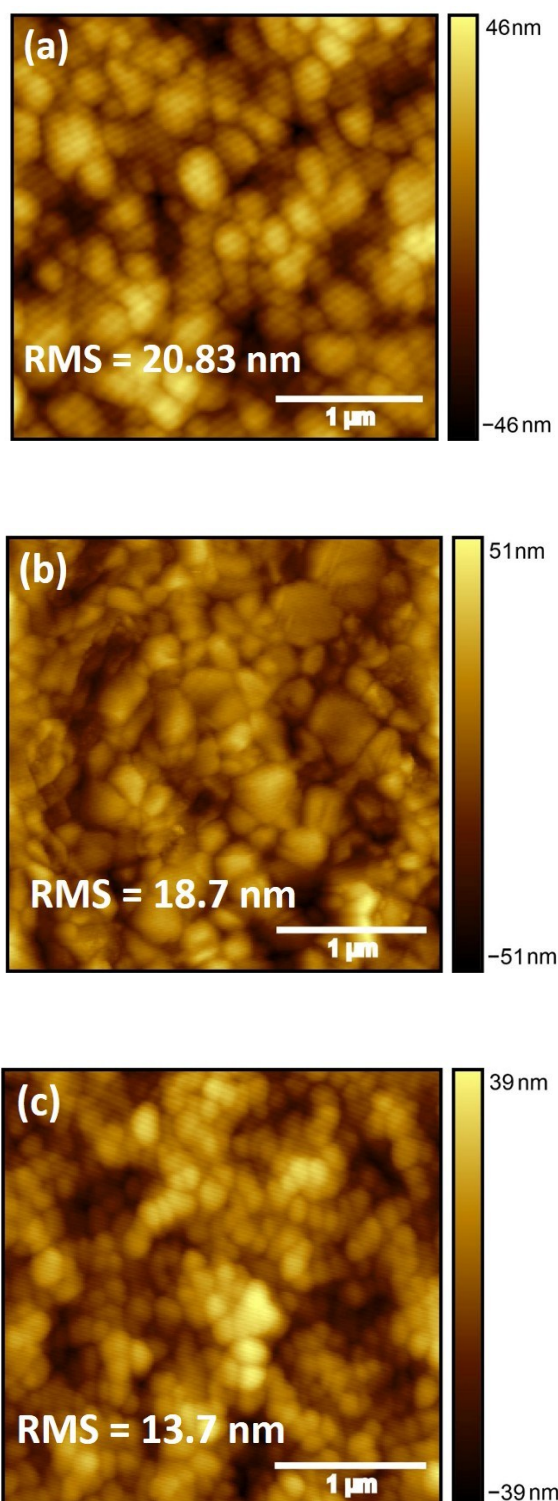

**Figure S1.** Atomic force microscopy images from the  $R_bCsFAMA$  perovskite for a) control film, b) film with post-deposited PEAI layer and c) film with PEAI anti-solvent.

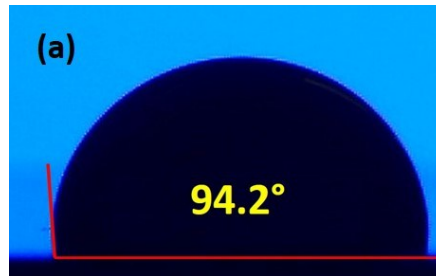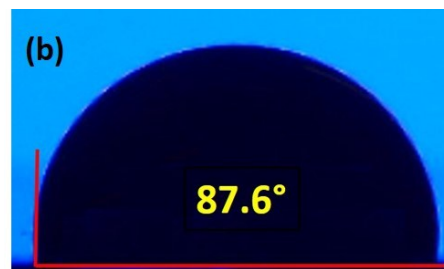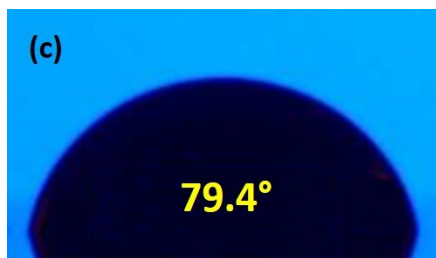

**Figure S2.** Contact angle tests for perovskite films with a) PEAI anti-solvent, b) PEAI layer and c) control, respectively.

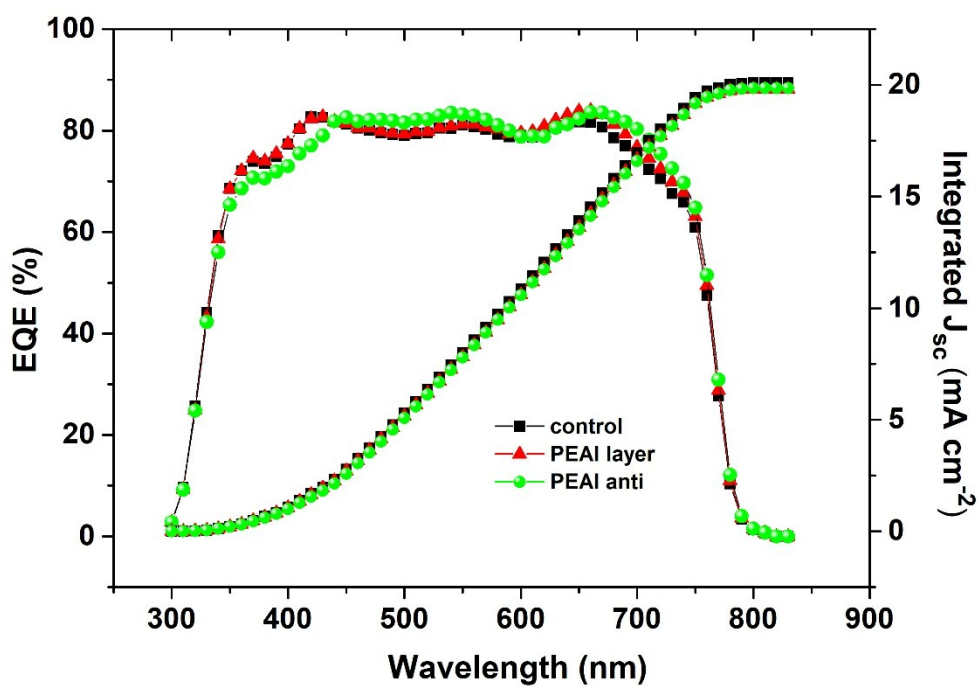

Figure S3. External quantum efficiency (EQE) spectra from the best obtained devices.

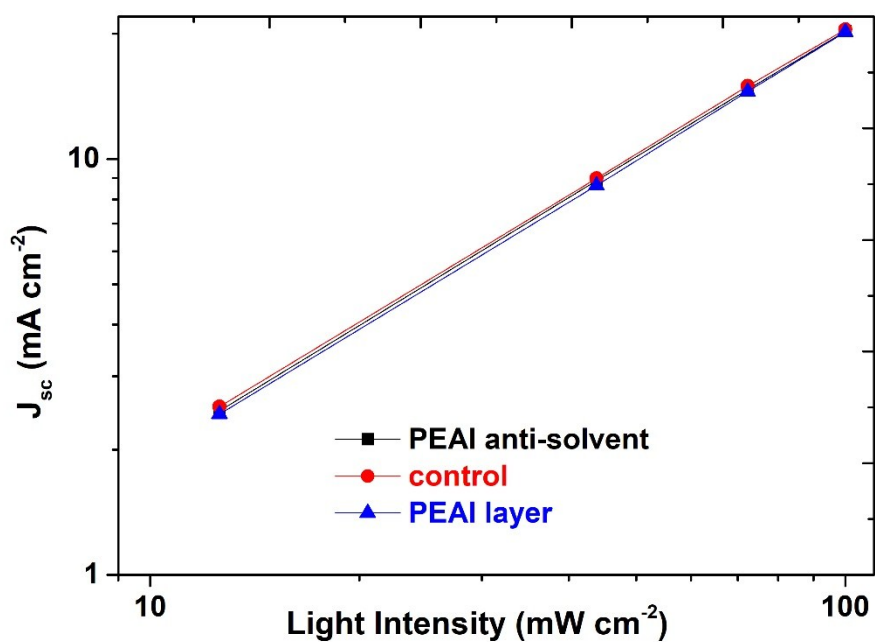

Figure S4.  $J_{sc}$  as a function of light intensity for the  $R_bC_sFAMA$  devices with and without PEAl treatment.
